# Annals of Oncology

Official Journal of the  
European Society for Medical Oncology

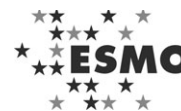

## Volume 17, 2006 Supplement 11

8<sup>th</sup> National Congress of Medical Oncology

18–21 November, 2006, Milan, Italy

### abstracts

|                                                            |      |                                                              |      |
|------------------------------------------------------------|------|--------------------------------------------------------------|------|
| plenary session                                            | xi3  | Session F: Lymphomas, multiple myeloma and leukemia          | xi56 |
| Session A: Early and advanced breast cancer                | xi5  | Session G: Central nervous system, sarcomas and rare tumours | xi60 |
| Session B: Lung cancer                                     | xi18 | Session H: Supportive and palliative care                    | xi65 |
| Session C: Molecular oncology, diagnostic and pharmacology | xi26 | Session L: Genitourinary and gynecological tumours           | xi75 |
| Session D: Colorectal cancer                               | xi39 | Session M: Neuroendocrines, head & neck and mesotheliomas    | xi84 |
| Session E: Gastrointestinal tumours (colorectal excluded)  | xi49 | author index                                                 | xi89 |

Please note that abstracts marked with an asterisk ‘\*’ are Oral Communications.
